# Supplementary material for: Targeting Btk/Etk of prostate cancer cells by a novel dual inhibitor
Source: PubMed Central journal article supplement — Cell Death Dis. 2014 Sep 4;5(9):e1409–. doi: 10.1038/cddis.2014.343 (PMC4540187; doi:10.1038/cddis.2014.343), 2014-09-04
Supplement: cddis2014343x1.pdf [file cddis2014343x1.pdf]

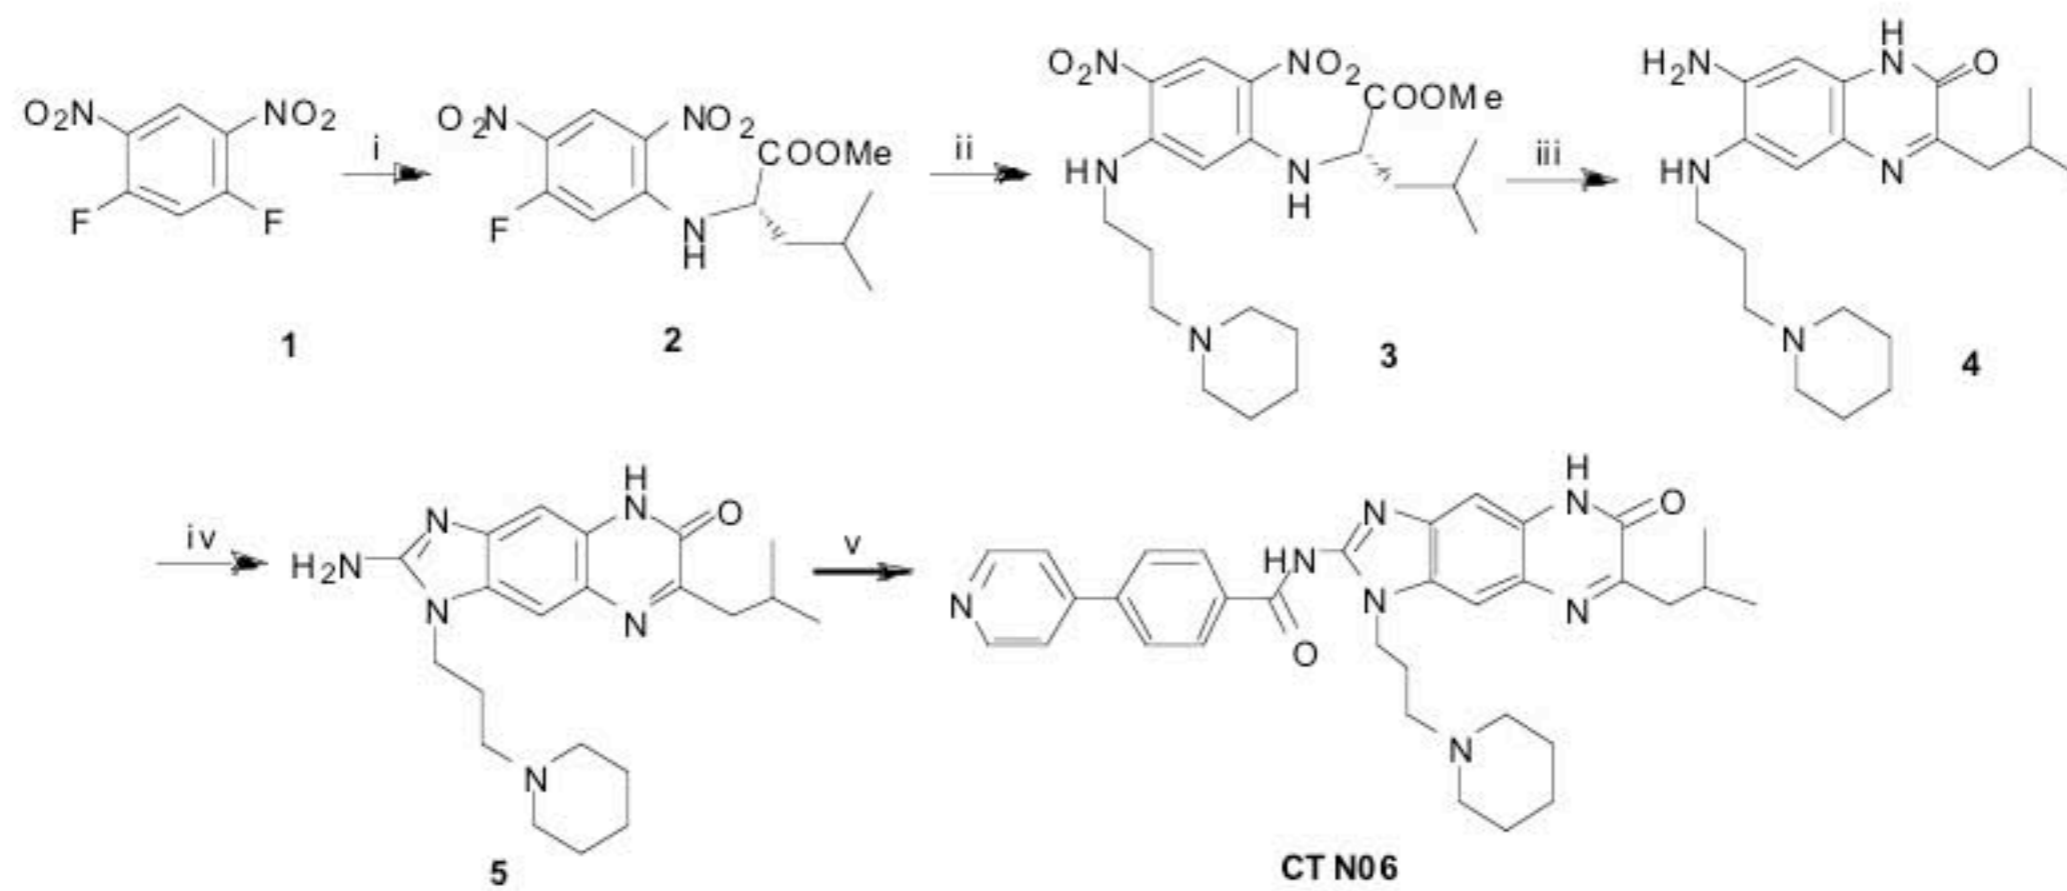

Figure S1

a

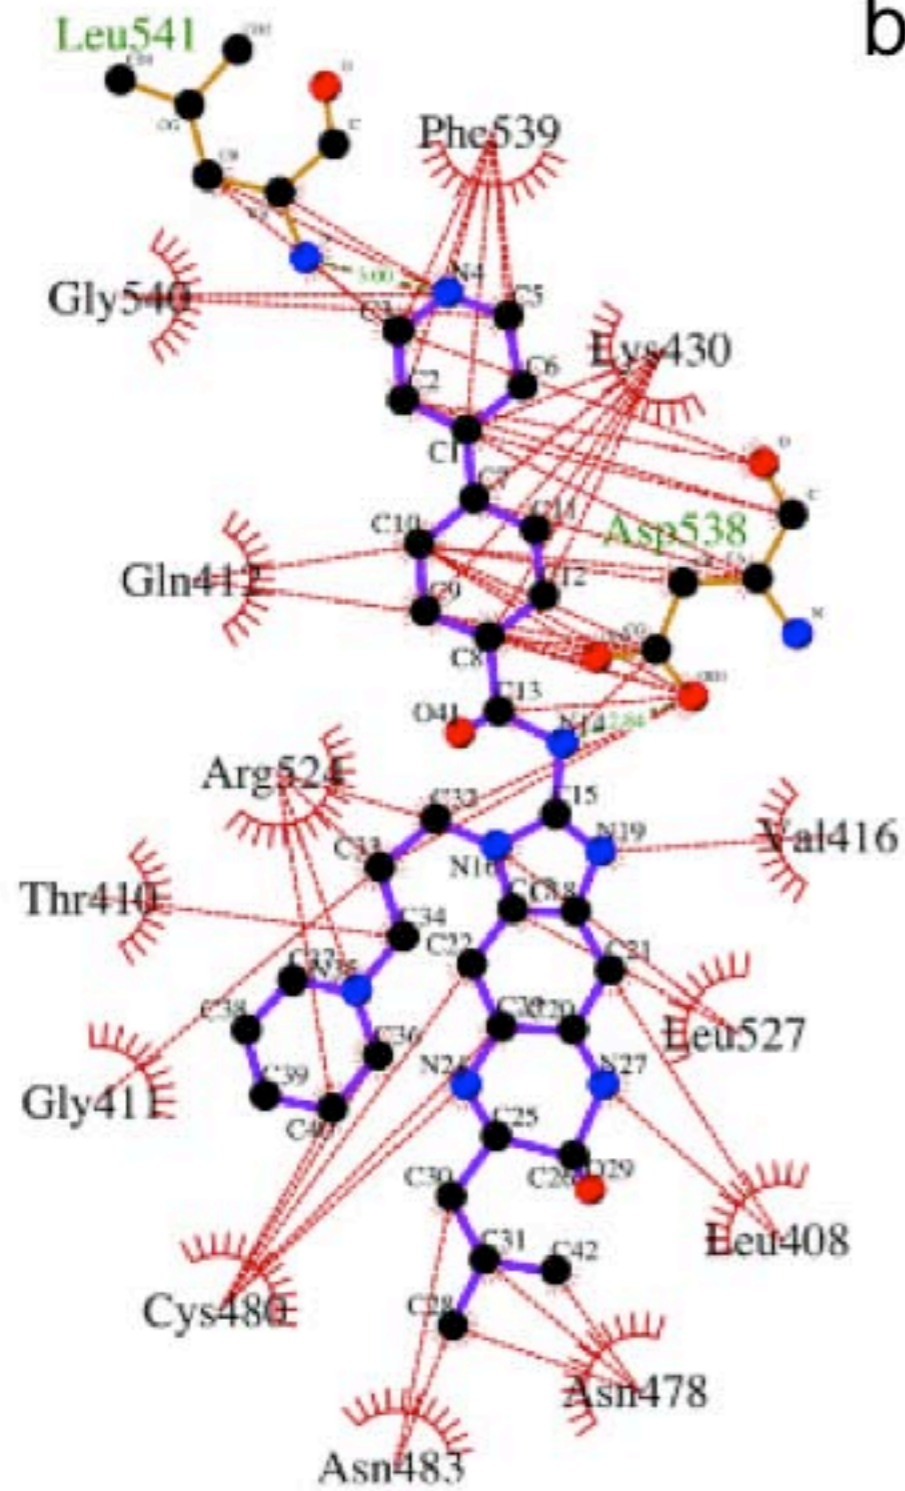

b

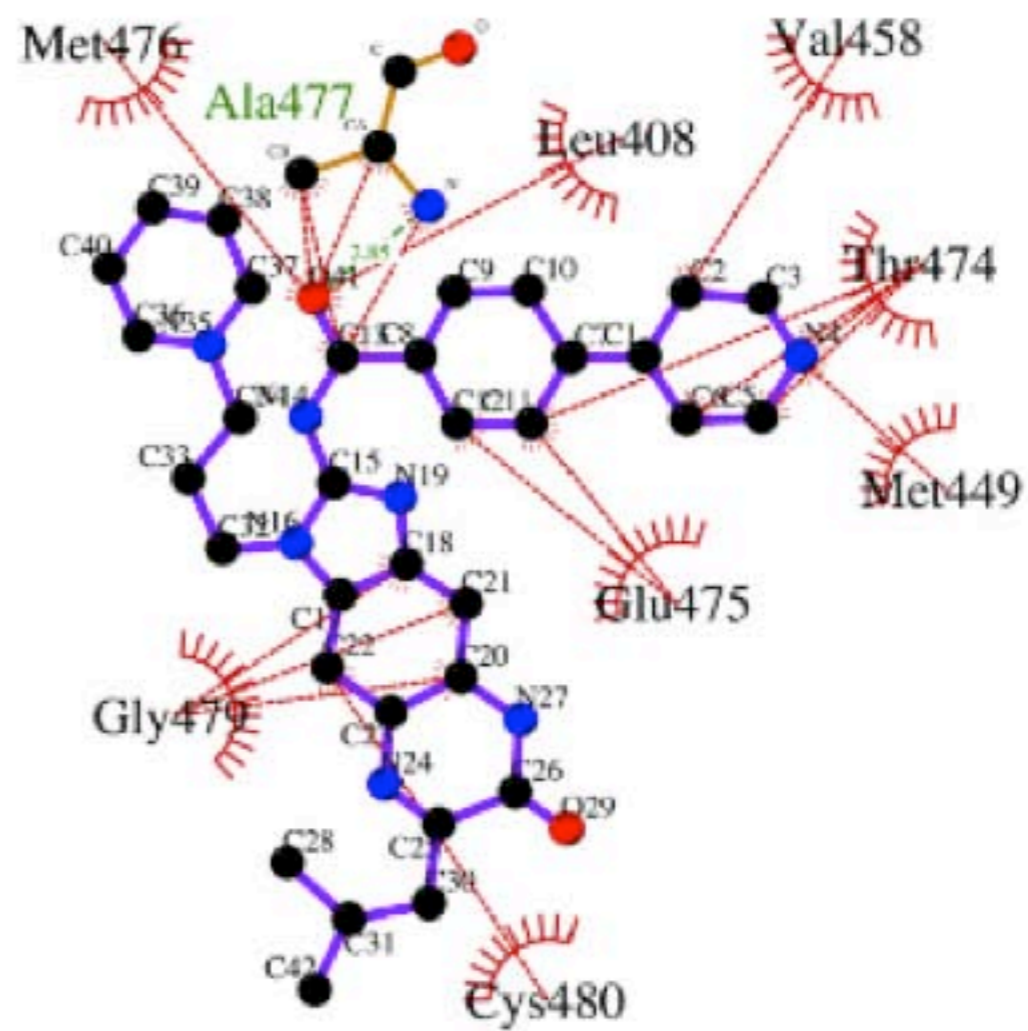

Figure S2

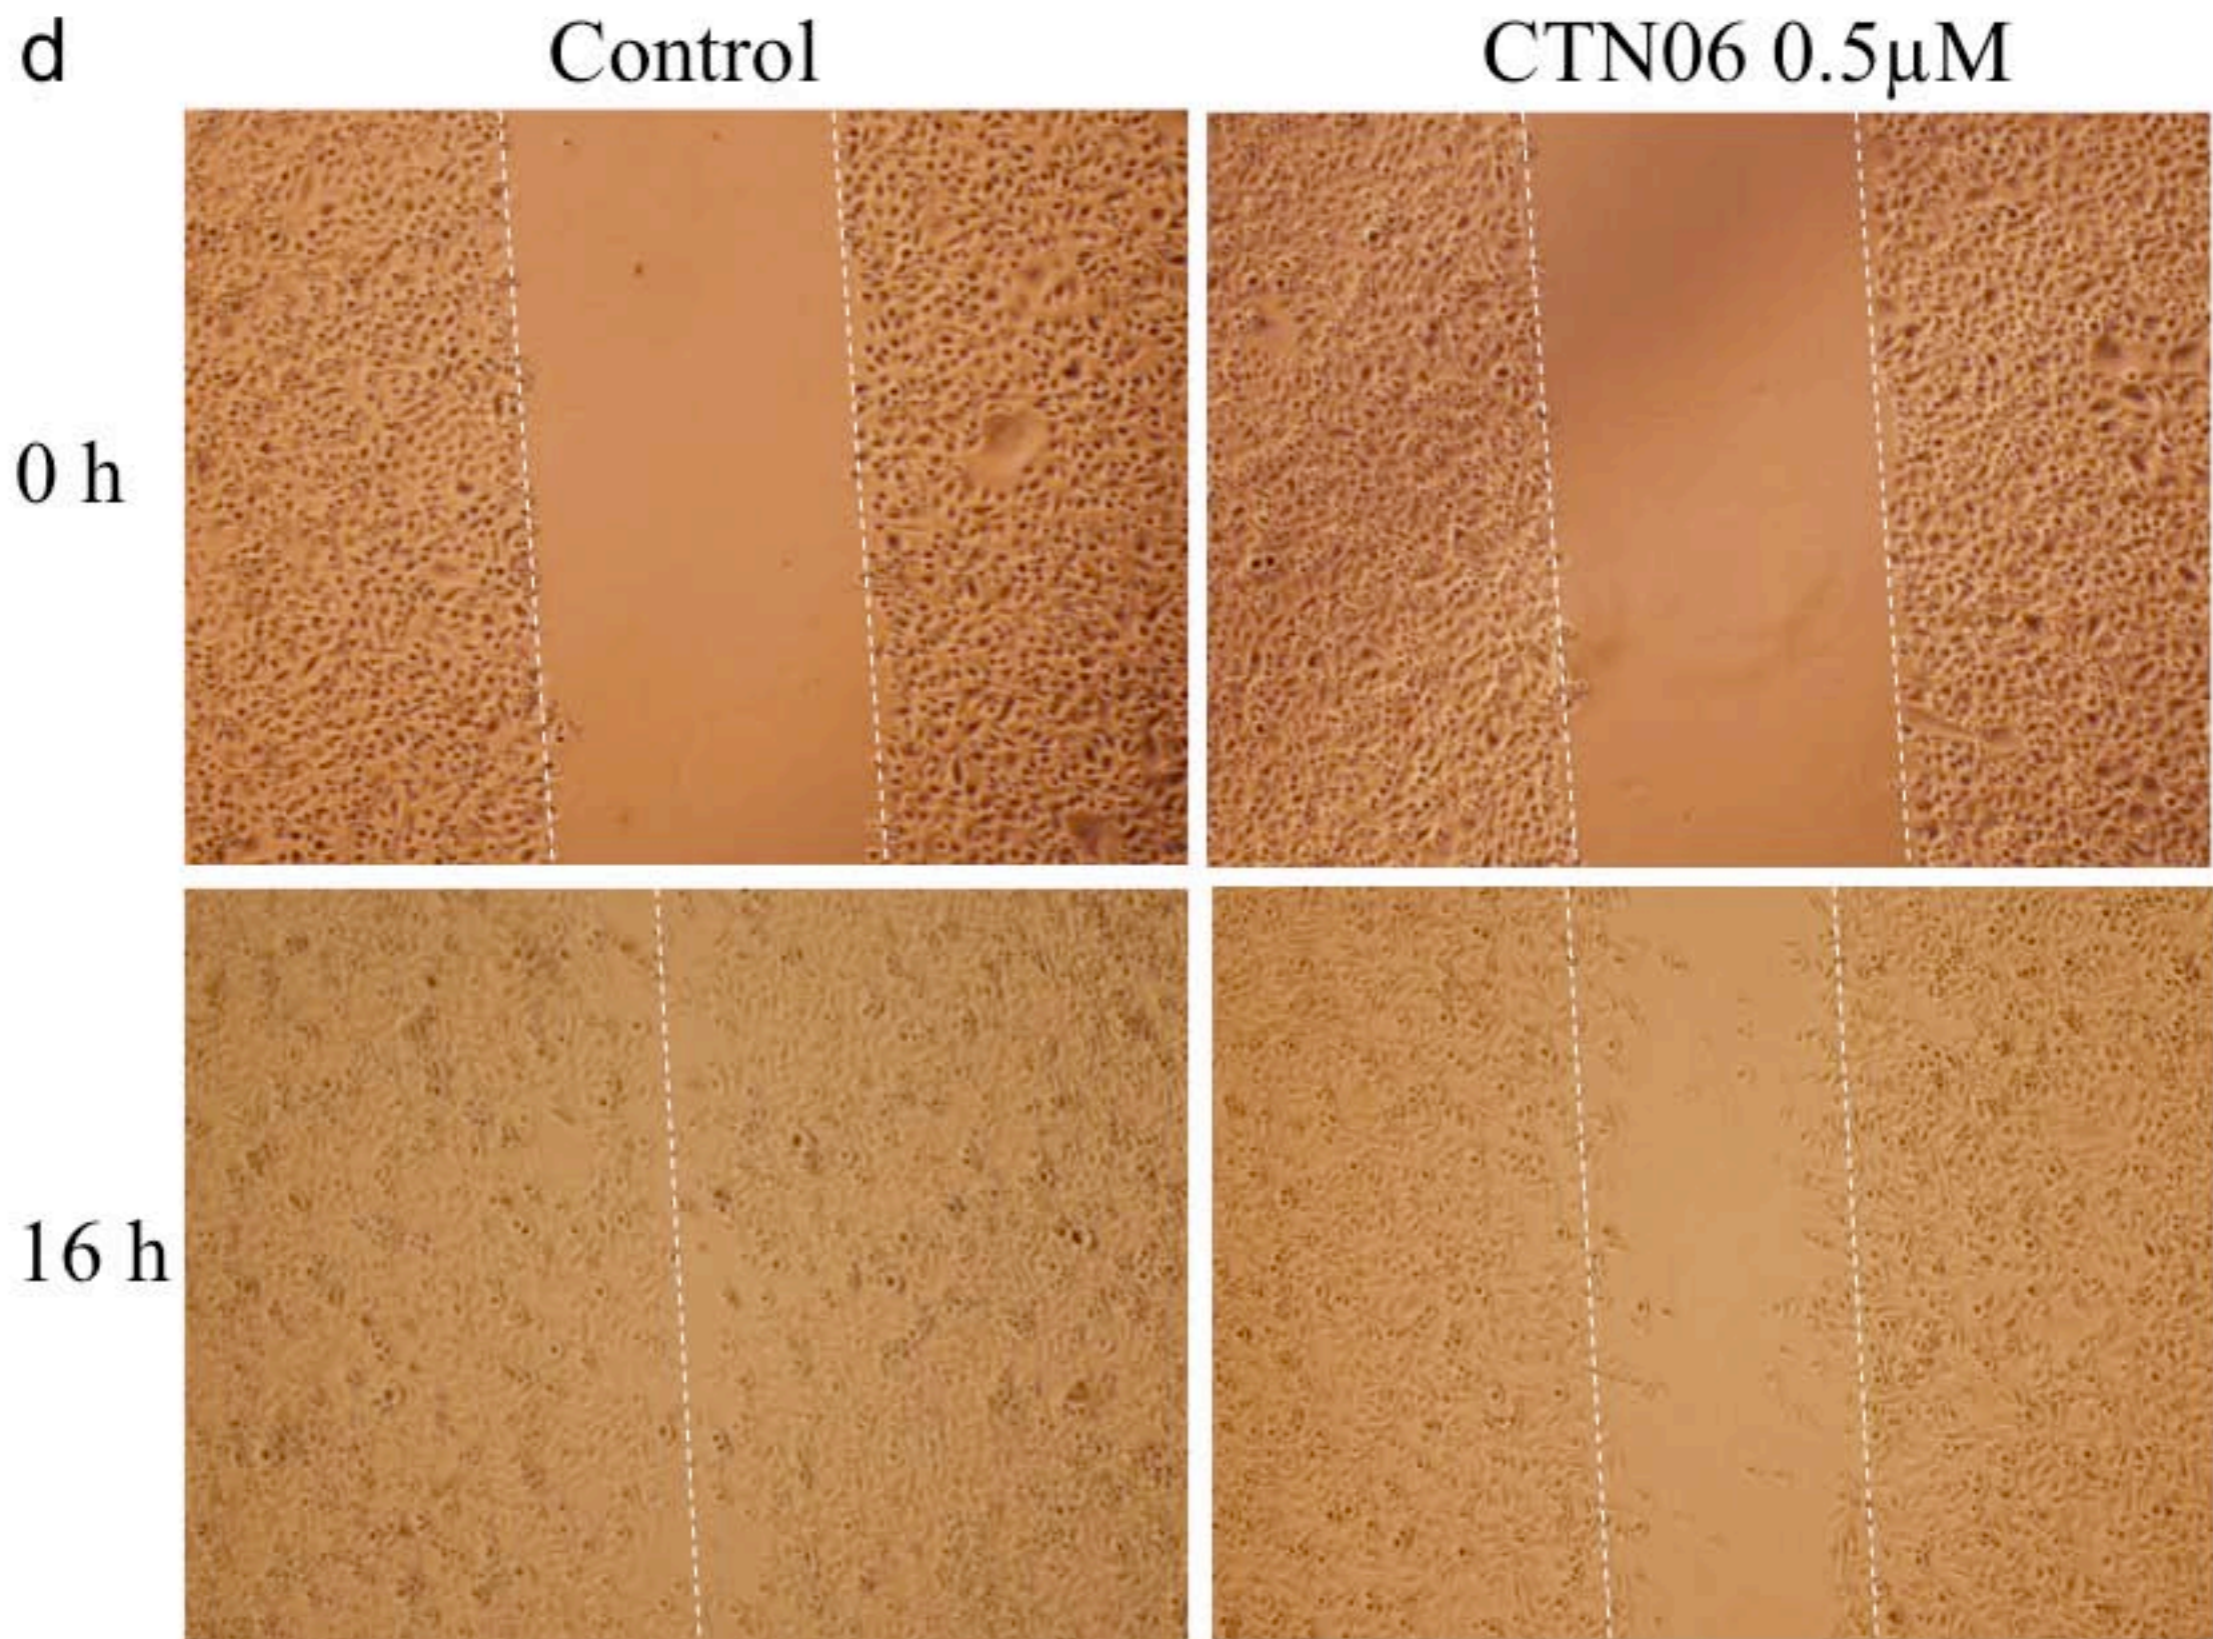

Figure S3

**a**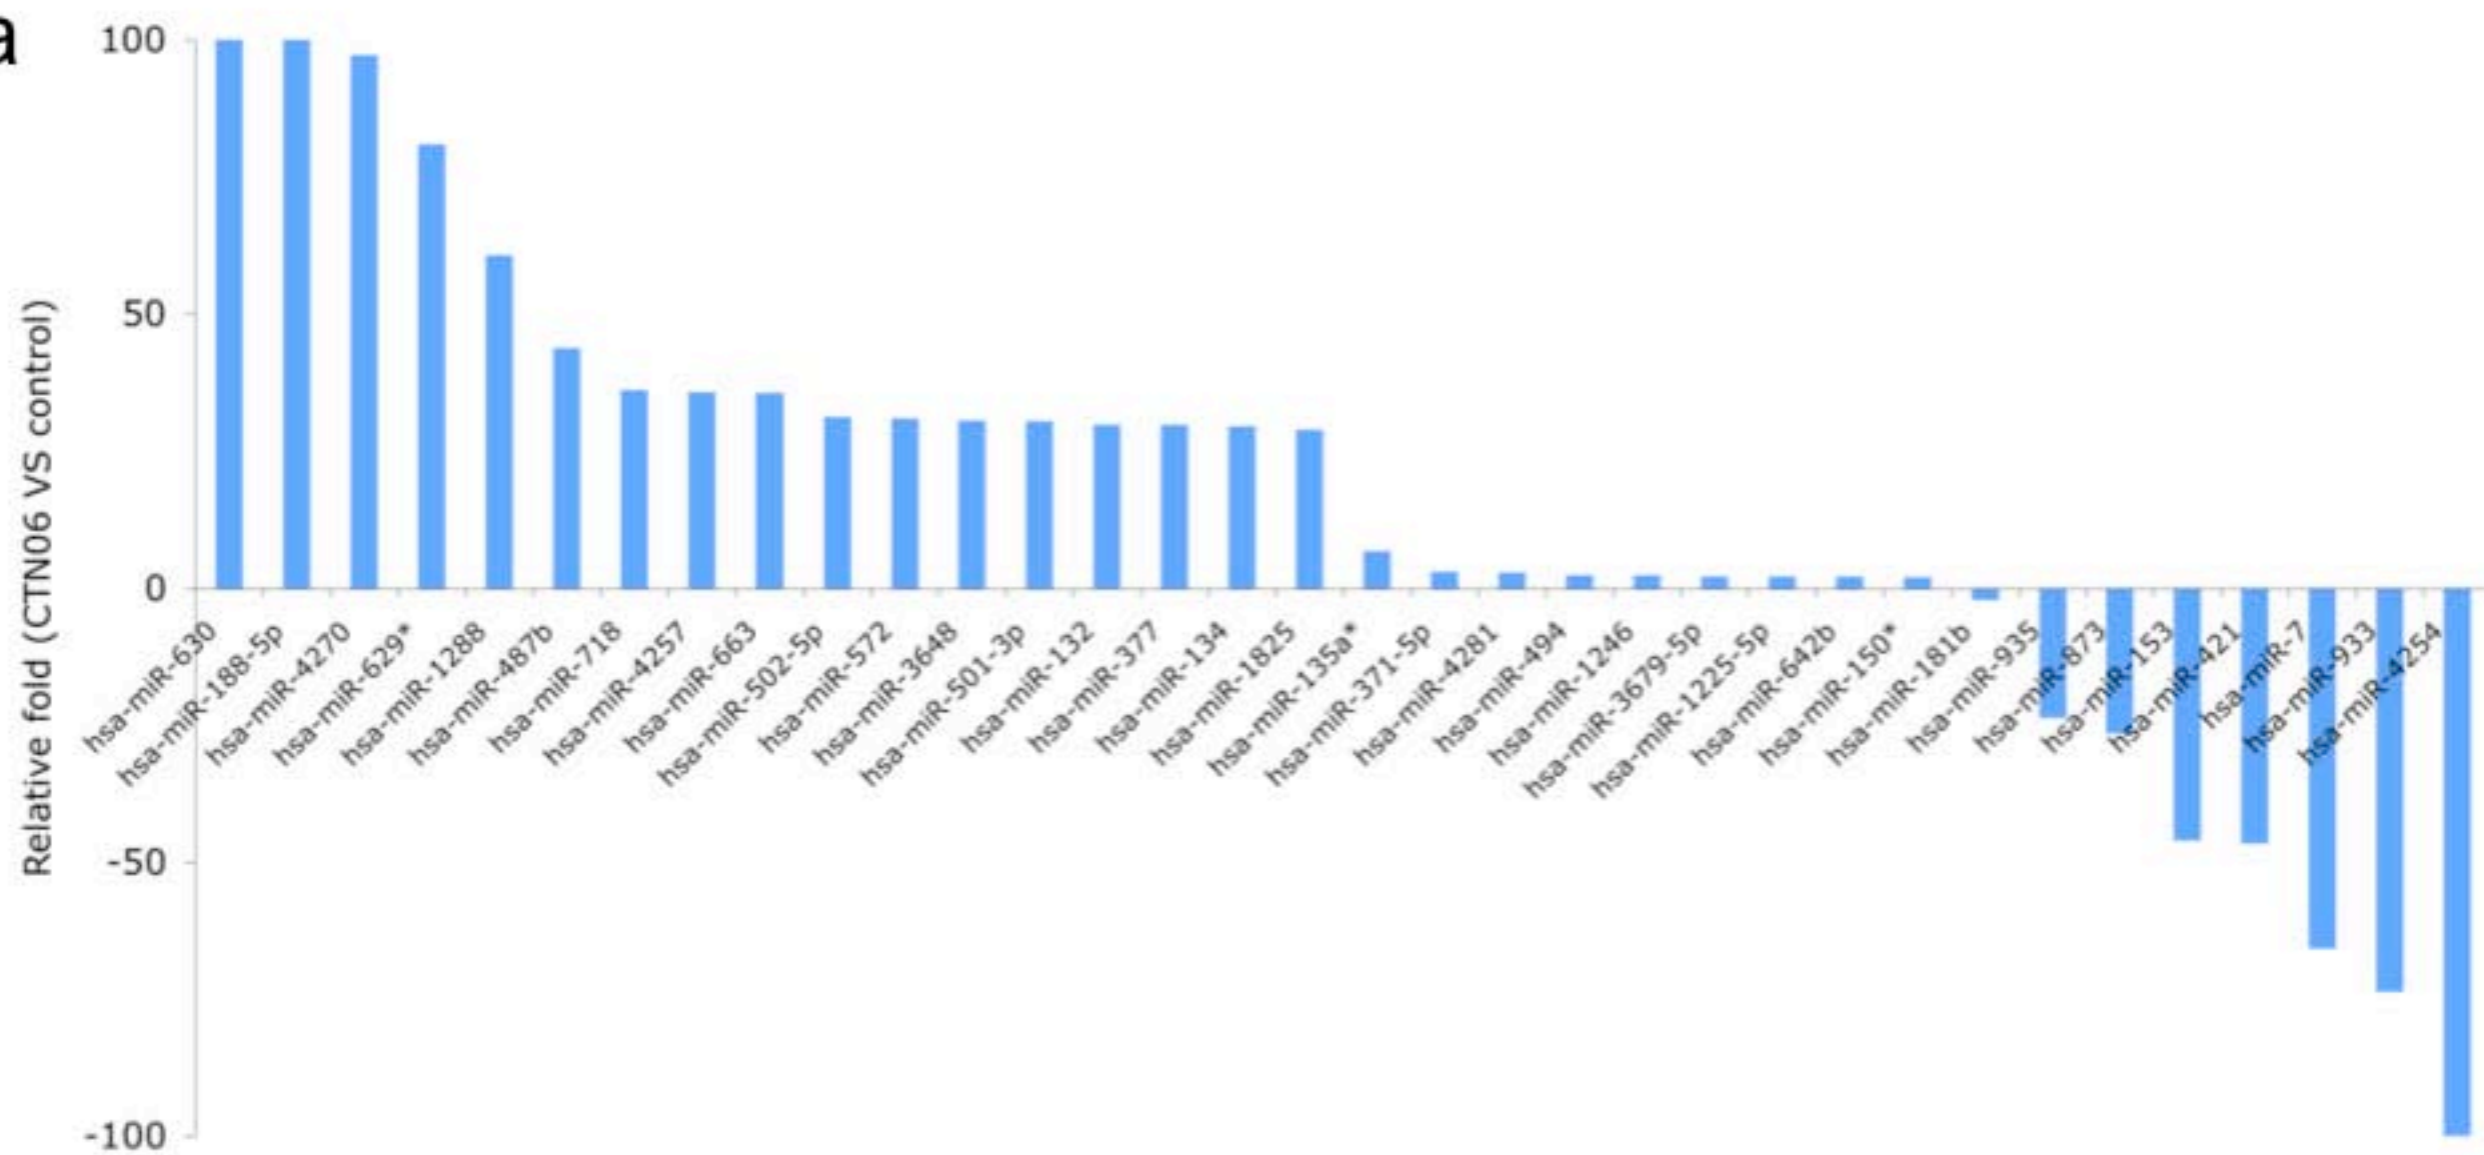

Figure S4a

b

| Tumor suppressive<br>MicroRNAs | Fold change | Relation to cancer                                                                              | References |
|--------------------------------|-------------|-------------------------------------------------------------------------------------------------|------------|
| hsa-miR-630                    | 148.8       | Upregulated by NGX6                                                                             | 32         |
| hsa-miR-487b                   | 43.8        | Downregulated in high risk neuroblastoma                                                        | 33         |
| <b>hsa-miR-132</b>             | 29.9        | Downregulated in <b>Prostate cancer</b> and<br><b>Pancreatic cancer</b> by promoter methylation | 34<br>35   |
| hsa-miR-135a*                  | 6.8         | Downregulation of JAK2                                                                          | 36         |
| hsa-miR-371-5p                 | 3.1         | Upregulated by 1,25 dihydroxyvitamin D3                                                         | 37         |
| hsa-miR-1246                   | 2.4         | Upregulated by p53                                                                              | 38         |
| hsa-miR-494                    | 2.4         | Downregulation of KIT                                                                           | 39         |
| hsa-miR-150*                   | 2.0         | Downregulation of NOTCH3                                                                        | 40         |
| Oncogenic<br>MicroRNAs         | Fold change | Relation to cancer                                                                              | References |
| hsa-miR-181b                   | -2.0        | Targeting p27 (activated by STAT3)                                                              | 41         |
| hsa-miR-421                    | -46.3       | Downregulation of ATM (regulated by N-Myc)<br>Downregulation of FXR                             | 42<br>43   |

Figure S4b

### C Oncogenic-related genes downregulated by CTN06

| Gene symbol | Gene name                                                    | Fold change |
|-------------|--------------------------------------------------------------|-------------|
| ABCG1       | ATP-binding cassette, sub-family G (WHITE), member 1         | -7.9        |
| PHACTR3     | phosphatase and actin regulator 3                            | -4.1        |
| PLCD4       | phospholipase C, delta 4                                     | -3.3        |
| IGFBP5      | insulin-like growth factor binding protein 5                 | -2.8        |
| PPAP2B      | phosphatidic acid phosphatase type 2B                        | -2.7        |
| PTGFR       | prostaglandin F receptor (FP)                                | -2.6        |
| FGF1        | fibroblast growth factor 1 (acidic)                          | -2.6        |
| PHLDB2      | pleckstrin homology-like domain, family B, member 2          | -2.5        |
| ABCG1       | ATP-binding cassette, sub-family G (WHITE), member 1         | -2.5        |
| SLC8A1      | solute carrier family 8 (sodium/calcium exchanger), member 1 | -2.5        |
| AHCTF1      | AT hook containing transcription factor 1                    | -2.3        |
| MMP13       | matrix metalloproteinase 13 (collagenase 3)                  | -2.3        |
| FLI1        | Friend leukemia virus integration 1                          | -2.3        |
| IGF2BP3     | insulin-like growth factor 2 mRNA binding protein 3          | -2.3        |
| GBX2        | gastrulation brain homeobox 2                                | -2.3        |
| FOXA2       | forkhead box A2                                              | -2.3        |
| G0S2        | G0/G1 switch 2                                               | -2.2        |
| SCEL        | sciellin                                                     | -2.2        |
| MET         | met proto-oncogene (hepatocyte growth factor receptor)       | -2.1        |
| PIK3CB      | phosphoinositide-3-kinase, catalytic, beta polypeptide       | -2.1        |
| MYCBP       | c-myc binding protein                                        | -2.1        |
| NFIB        | Nuclear factor I/B                                           | -2.0        |
| PPAP2B      | phosphatidic acid phosphatase type 2B                        | -2.0        |
| CDGAP       | Cdc42 GTPase-activating protein                              | -2.0        |
| DOCK2       | dedicator of cytokinesis 2                                   | -2.0        |
